# Supplementary material
Source: HighWire-hosted journal article supplement (https://www.highwirestage.com/highwire/filestream/52366/field_highwire_adjunct_files/0/3487_table.pdf)
Supplement: 3487_table.pdf [file 3487_table.pdf]

**On-line Table: Incidental thyroid nodules by CT technique, patient demographics, and CT nodule appearances**

|                                                     | Patients | Total | Patients with<br>Nodules | Total | Nodule<br>Prevalence |
|-----------------------------------------------------|----------|-------|--------------------------|-------|----------------------|
| Total eligible studies available for review         | 848      |       |                          |       |                      |
| Excluded due to incomplete visualization of thyroid | 22       |       |                          |       |                      |
| Excluded due to known thyroid disease               | 71       |       |                          |       |                      |
| Total                                               | 755      |       | 133                      |       | 18%                  |
| CT technique                                        |          |       |                          |       |                      |
| CT soft-tissue neck                                 | 549      | 73%   | 88                       | 66%   | 16%                  |
| CTA neck                                            | 206      | 27%   | 45                       | 34%   | 22%                  |
| Sex                                                 |          |       |                          |       |                      |
| Male                                                | 396      | 52%   | 43                       | 32%   | 11%                  |
| Female                                              | 359      | 48%   | 90                       | 68%   | 25%                  |
| Age (yr)                                            |          |       |                          |       |                      |
| 0–19                                                | 89       | 12%   | 5                        | 4%    | 6%                   |
| 20–34                                               | 81       | 11%   | 4                        | 3%    | 5%                   |
| 35–49                                               | 139      | 18%   | 25                       | 19%   | 18%                  |
| 50–65                                               | 247      | 33%   | 38                       | 29%   | 15%                  |
| ≥65                                                 | 199      | 26%   | 70                       | 53%   | 35%                  |
| Nodule characteristics                              |          |       |                          |       |                      |
| Multiple                                            |          |       | 52                       | 39%   |                      |
| Calcification                                       |          |       | 15                       | 11%   |                      |
| Cystic                                              |          |       | 6                        | 5%    |                      |
| Aggressive features                                 |          |       | 2                        | 2%    |                      |
| Nodule size                                         |          |       |                          |       |                      |
| 5–9 mm                                              |          |       | 76                       | 57%   |                      |
| 10–14 mm                                            |          |       | 35                       | 26%   |                      |
| 15–19 mm                                            |          |       | 10                       | 8%    |                      |
| ≥20 mm                                              |          |       | 12                       | 9%    |                      |
